# Supplementary material for: Contributing determinants of overall and wealth-related inequality in under-5 mortality in 13 African countries
Source: HighWire-hosted journal article supplement (doi:10.1136/jech-2012-202195), 2013-05-23
Supplement: jech-2012-202195supp_appendix.pdf [file jech-2012-202195supp_appendix.pdf]

**Appendix: Multivariate logistic regression of under-5 mortality: regression coefficients, confidence intervals and p-value in the 13 countries, DHS 2007-2010**

|                              | DR Congo 2007 |       |       |      | Egypt 2008 |       |       |      | Ghana 2008 |       |      |      | Kenya 2008/09 |       |       |      | Lesotho 2009/10 |       |       |      | Liberia 2007 |       |      |      | Madagascar 2008/09 |       |      |      |
|------------------------------|---------------|-------|-------|------|------------|-------|-------|------|------------|-------|------|------|---------------|-------|-------|------|-----------------|-------|-------|------|--------------|-------|------|------|--------------------|-------|------|------|
|                              | b             | LCL   | UCL   | P    | b          | LCL   | UCL   | P    | b          | LCL   | UCL  | P    | b             | LCL   | UCL   | P    | b               | LCL   | UCL   | P    | b            | LCL   | UCL  | P    | b                  | LCL   | UCL  | P    |
| Low household wealth         | 0.07          | -0.16 | 0.30  | .563 | 0.38       | -0.06 | 0.82  | .093 | -0.58      | -1.26 | 0.10 | .094 | 0.02          | -0.38 | 0.42  | .935 | 0.02            | -0.35 | 0.39  | .916 | 0.09         | -0.28 | 0.45 | .643 | 0.07               | -0.19 | 0.33 | .594 |
| No skilled birth attendance  | 0.20          | -0.06 | 0.46  | .140 | 0.01       | -0.35 | 0.37  | .942 | -0.23      | -0.66 | 0.21 | .310 | -0.13         | -0.44 | 0.17  | .385 | 0.34            | 0.00  | 0.68  | .052 | 0.02         | -0.37 | 0.41 | .918 | 0.13               | -0.10 | 0.36 | .273 |
| Male Birth 2-4 short         | 0.24          | 0.08  | 0.41  | .005 | 0.30       | 0.02  | 0.57  | .035 | 0.08       | -0.29 | 0.45 | .671 | 0.32          | 0.01  | 0.62  | .041 | 0.36            | 0.08  | 0.64  | .012 | 0.20         | -0.07 | 0.47 | .141 | 0.05               | -0.17 | 0.27 | .670 |
| Birth 2-4 long               | 0.00          | -0.33 | 0.32  | .982 | 0.61       | 0.20  | 1.03  | .004 | -0.50      | -1.25 | 0.25 | .191 | 0.22          | -0.24 | 0.68  | .341 | 0.09            | -0.45 | 0.63  | .748 | 0.23         | -0.30 | 0.76 | .394 | 0.13               | -0.19 | 0.45 | .440 |
| Birth 5+ short               | -0.51         | -0.78 | -0.24 | .000 | -0.24      | -0.61 | 0.12  | .187 | -0.44      | -0.94 | 0.06 | .085 | -0.27         | -0.71 | 0.16  | .220 | -0.53           | -0.90 | -0.16 | .006 | -0.26        | -0.68 | 0.16 | .232 | -0.16              | -0.46 | 0.15 | .306 |
| Birth 5+ long                | 0.42          | 0.05  | 0.79  | .025 | 0.80       | 0.00  | 1.60  | .050 | 0.78       | -0.01 | 1.57 | .052 | 0.01          | -0.60 | 0.63  | .974 | 0.49            | -0.30 | 1.29  | .224 | 0.41         | -0.24 | 1.06 | .220 | 0.80               | 0.34  | 1.26 | .001 |
| Mother's age at birth <20    | -0.40         | -0.77 | -0.03 | .037 | 0.47       | -0.07 | 1.00  | .086 | -0.30      | -1.01 | 0.41 | .407 | -0.36         | -0.94 | 0.22  | .219 | -0.35           | -0.95 | 0.24  | .247 | -0.03        | -0.61 | 0.56 | .933 | 0.22               | -0.20 | 0.65 | .307 |
| Rural residence              | 0.03          | -0.27 | 0.33  | .830 | 0.15       | -0.20 | 0.50  | .401 | 0.08       | -0.44 | 0.60 | .773 | -0.30         | -0.65 | 0.05  | .098 | -0.44           | -0.85 | -0.02 | .039 | 0.27         | -0.13 | 0.67 | .187 | 0.12               | -0.17 | 0.42 | .420 |
| Mother low education         | 0.09          | -0.17 | 0.35  | .506 | -0.07      | -0.49 | 0.35  | .742 | 0.19       | -0.34 | 0.73 | .483 | 0.00          | -0.50 | 0.50  | .997 | 0.13            | -0.44 | 0.70  | .661 | -0.02        | -0.43 | 0.39 | .931 | 0.05               | -0.34 | 0.44 | .798 |
| Father low education         | 0.34          | 0.10  | 0.57  | .005 | -0.35      | -0.77 | 0.06  | .098 | 0.08       | -0.36 | 0.53 | .714 | 0.18          | -0.18 | 0.53  | .325 | 0.30            | -0.05 | 0.65  | .092 | -0.25        | -0.65 | 0.15 | .213 | -0.13              | -0.44 | 0.19 | .440 |
| Mother household agriculture | -0.04         | -0.27 | 0.20  | .765 | 0.17       | -0.24 | 0.58  | .409 | 0.36       | -0.08 | 0.79 | .106 | 0.61          | 0.25  | 0.98  | .001 | -0.10           | -0.44 | 0.25  | .585 | 0.32         | -0.01 | 0.64 | .057 | 0.02               | -0.24 | 0.29 | .858 |
| Father household agriculture | -0.02         | -0.33 | 0.29  | .911 | -0.35      | -0.85 | 0.15  | .169 | 0.34       | -0.25 | 0.93 | .258 | -0.36         | -0.71 | -0.01 | .046 | -0.35           | -0.69 | -0.02 | .039 | -0.19        | -0.55 | 0.17 | .296 | 0.17               | -0.34 | 0.68 | .514 |
| Mother household agriculture | 0.14          | -0.21 | 0.50  | .439 | -0.84      | -2.15 | 0.48  | .213 | 0.14       | -0.33 | 0.61 | .551 | -0.19         | -0.56 | 0.19  | .331 | -0.24           | -0.70 | 0.21  | .294 | -0.49        | -1.00 | 0.01 | .057 | 0.03               | -0.40 | 0.46 | .902 |
| Father household agriculture | 0.24          | -0.05 | 0.52  | .103 | 0.58       | 0.03  | 1.12  | .039 | 0.93       | -0.26 | 2.12 | .125 | 0.19          | -0.23 | 0.61  | .373 | 0.11            | -0.25 | 0.48  | .541 | 0.31         | -0.26 | 0.89 | .289 | -0.41              | -1.14 | 0.32 | .271 |
| Region 2                     | 0.22          | -0.05 | 0.50  | .116 | 0.28       | -0.18 | 0.73  | .237 | 0.44       | -0.14 | 1.03 | .140 | 0.37          | -0.08 | 0.83  | .110 | 0.12            | -0.20 | 0.44  | .464 | 0.11         | -0.34 | 0.55 | .641 | 0.06               | -0.30 | 0.42 | .763 |
| Region 3                     | 0.18          | -0.38 | 0.73  | .533 | -0.76      | -1.29 | -0.24 | .005 | 0.38       | -0.53 | 1.29 | .408 | -0.11         | -1.04 | 0.83  | .821 | 0.67            | 0.19  | 1.14  | .006 | 0.27         | -0.33 | 0.87 | .380 | 0.29               | -0.06 | 0.64 | .100 |
| Region 4                     | -0.08         | -0.65 | 0.48  | .777 | -0.40      | -0.98 | 0.18  | .180 | 0.25       | -0.70 | 1.21 | .604 | -0.31         | -1.12 | 0.51  | .458 | 0.11            | -0.43 | 0.65  | .686 | 0.46         | -0.10 | 1.02 | .109 | -0.28              | -0.71 | 0.16 | .219 |
| Region 5                     | 0.17          | -0.39 | 0.72  | .553 | -0.49      | -1.23 | 0.25  | .194 | -0.38      | -1.50 | 0.75 | .510 | -0.50         | -1.59 | 0.60  | .375 | 0.27            | -0.30 | 0.83  | .352 | 0.18         | -0.41 | 0.78 | .545 | 0.04               | -0.36 | 0.44 | .839 |
| Region 6                     | -0.17         | -0.79 | 0.46  | .607 |            |       |       |      | 0.54       | -0.38 | 1.45 | .251 | 0.32          | -0.50 | 1.15  | .447 | 0.36            | -0.13 | 0.85  | .146 | 0.41         | -0.19 | 1.01 | .181 | -0.30              | -0.72 | 0.12 | .165 |
| Region 7                     | -0.33         | -1.01 | 0.34  | .333 |            |       |       |      | 0.35       | -0.48 | 1.19 | .407 | -1.02         | -1.94 | -0.09 | .032 | 0.29            | -0.23 | 0.81  | .268 | 0.40         | -0.13 | 0.94 | .139 | -0.19              | -0.81 | 0.43 | .545 |
| Region 8                     | 0.41          | -0.10 | 0.91  | .114 |            |       |       |      | -0.04      | -1.07 | 0.99 | .937 | -0.24         | -1.16 | 0.69  | .616 | 0.34            | -0.24 | 0.91  | .254 |              |       |      |      |                    |       |      |      |
| Region 9                     | 0.22          | -0.31 | 0.75  | .417 |            |       |       |      | 0.61       | -0.23 | 1.45 | .157 | -0.85         | -1.83 | 0.14  | .094 | 0.22            | -0.48 | 0.92  | .535 |              |       |      |      |                    |       |      |      |
| Region 10                    | 0.43          | -0.07 | 0.94  | .093 |            |       |       |      | -0.17      | -1.19 | 0.86 | .752 |               |       |       |      | 0.14            | -0.41 | 0.69  | .611 |              |       |      |      |                    |       |      |      |
| Region 11                    | 0.07          | -0.40 | 0.54  | .768 |            |       |       |      | 0.73       | -0.23 | 1.68 | .136 |               |       |       |      | 0.08            | -0.40 | 0.57  | .735 |              |       |      |      |                    |       |      |      |

Occupation other: Prof., Tech., Manag., Clerical, Sales, Services, Skilled manual, other. Household: Did not work, Household & Domestic, Unskilled manual, None. Agriculture: Agric-self employed, Agric-employee. b: regression coefficient. LCL: 95% lower confidence limit. UCL: 95% upper confidence limit. P: p-value.

# Appendix (continued)

|                              | Malawi 2010 |       |       |      | Nigeria 2008 |       |       |      | SaoTome & Principe 2008/09 |       |       |      | Sierra Leone 2008 |       |       |      | Tanzania 2009/10 |       |      |      | Zambia 2007 |       |       |      |
|------------------------------|-------------|-------|-------|------|--------------|-------|-------|------|----------------------------|-------|-------|------|-------------------|-------|-------|------|------------------|-------|------|------|-------------|-------|-------|------|
|                              | b           | LCL   | UCL   | P    | b            | LCL   | UCL   | P    | b                          | LCL   | UCL   | P    | b                 | LCL   | UCL   | P    | b                | LCL   | UCL  | P    | b           | LCL   | UCL   | P    |
| Low household wealth         | -0.03       | -0.18 | 0.12  | .667 | 0.10         | -0.03 | 0.23  | .133 | 0.51                       | -0.19 | 1.21  | .155 | 0.18              | -0.09 | 0.44  | .191 | 0.18             | -0.20 | 0.56 | .351 | -0.20       | -0.48 | 0.09  | .183 |
| No skilled birth attendance  | 0.07        | -0.06 | 0.21  | .286 | -0.03        | -0.15 | 0.09  | .602 | -0.57                      | -1.67 | 0.53  | .312 | 0.31              | 0.05  | 0.58  | .021 | 0.06             | -0.24 | 0.36 | .680 | 0.00        | -0.27 | 0.27  | .999 |
| Male                         | 0.29        | 0.15  | 0.43  | .000 | 0.13         | 0.04  | 0.21  | .003 | 1.28                       | 0.42  | 2.14  | .004 | -0.17             | -0.39 | 0.05  | .124 | 0.29             | 0.06  | 0.51 | .014 | 0.20        | -0.02 | 0.41  | .070 |
| Birth 2-4 short              | 0.12        | -0.16 | 0.40  | .387 | 0.44         | 0.29  | 0.60  | .000 | 1.66                       | 0.20  | 3.12  | .028 | 0.09              | -0.33 | 0.51  | .675 | 0.24             | -0.20 | 0.67 | .287 | 0.15        | -0.29 | 0.60  | .502 |
| Birth 2-4 long               | -0.50       | -0.70 | -0.30 | .000 | -0.28        | -0.42 | -0.14 | .000 | 1.07                       | -0.22 | 2.36  | .108 | -0.56             | -0.88 | -0.25 | .000 | -0.25            | -0.59 | 0.10 | .157 | -0.46       | -0.78 | -0.13 | .006 |
| Birth 5+ short               | 0.41        | 0.07  | 0.76  | .019 | 0.82         | 0.64  | 1.00  | .000 | 2.96                       | 1.24  | 4.67  | .001 | 0.71              | 0.19  | 1.23  | .008 | 0.08             | -0.53 | 0.70 | .786 | 0.00        | -0.57 | 0.56  | .990 |
| Birth 5+ long                | -0.54       | -0.83 | -0.26 | .000 | 0.13         | -0.04 | 0.29  | .126 | 0.87                       | -0.92 | 2.66  | .346 | -0.25             | -0.69 | 0.19  | .261 | -0.40            | -0.91 | 0.10 | .117 | -0.67       | -1.12 | -0.23 | .003 |
| Mother's age at birth <20    | -0.20       | -0.39 | -0.01 | .038 | 0.25         | 0.13  | 0.36  | .000 | -0.09                      | -1.07 | 0.89  | .856 | 0.18              | -0.12 | 0.49  | .239 | -0.10            | -0.52 | 0.31 | .625 | -0.18       | -0.46 | 0.11  | .224 |
| Rural residence              | -0.12       | -0.37 | 0.14  | .370 | 0.33         | 0.19  | 0.48  | .000 | -1.28                      | -1.98 | -0.57 | .001 | -0.51             | -0.85 | -0.16 | .005 | -0.28            | -0.73 | 0.16 | .210 | -0.35       | -0.68 | -0.03 | .035 |
| Mother low education         | 0.17        | -0.02 | 0.36  | .073 | 0.10         | -0.04 | 0.25  | .162 | 1.56                       | 0.47  | 2.66  | .006 | -0.10             | -0.52 | 0.32  | .634 | 0.00             | -0.26 | 0.26 | .994 | 0.12        | -0.14 | 0.37  | .370 |
| Father low education         | 0.02        | -0.15 | 0.19  | .825 | 0.07         | -0.06 | 0.19  | .295 | -0.19                      | -0.89 | 0.51  | .590 | 0.22              | -0.14 | 0.58  | .236 | 0.01             | -0.25 | 0.27 | .948 | 0.23        | -0.03 | 0.48  | .083 |
| Mother household agriculture | -0.07       | -0.28 | 0.14  | .502 | -0.14        | -0.25 | -0.02 | .019 | 0.05                       | -0.73 | 0.83  | .902 | -0.04             | -0.42 | 0.34  | .842 | 0.27             | -0.26 | 0.80 | .312 | -0.11       | -0.40 | 0.18  | .470 |
| Father household agriculture | -0.10       | -0.30 | 0.09  | .302 | -0.07        | -0.20 | 0.07  | .351 | 1.40                       | 0.39  | 2.41  | .008 | 0.12              | -0.21 | 0.45  | .461 | -0.27            | -0.79 | 0.25 | .309 | 0.12        | -0.21 | 0.45  | .482 |
| Region 2                     | 0.05        | -0.24 | 0.34  | .740 | 0.17         | 0.00  | 0.33  | .049 | -0.73                      | -1.50 | 0.04  | .068 | 0.06              | -0.25 | 0.37  | .711 | -0.27            | -1.31 | 0.76 | .609 | -0.24       | -0.63 | 0.15  | .229 |
| Region 3                     | 0.16        | -0.12 | 0.44  | .266 | 0.18         | 0.01  | 0.35  | .035 | -1.10                      | -1.95 | -0.26 | .012 | 0.28              | -0.05 | 0.62  | .098 | -0.63            | -1.91 | 0.65 | .336 | 0.36        | -0.01 | 0.74  | .057 |
| Region 4                     |             |       |       |      | 0.19         | 0.00  | 0.37  | .049 | -0.65                      | -1.55 | 0.25  | .163 | 0.34              | -0.14 | 0.82  | .161 | 0.16             | -0.77 | 1.08 | .741 | 0.03        | -0.42 | 0.47  | .911 |
| Region 5                     |             |       |       |      | 0.01         | -0.18 | 0.19  | .927 |                            |       |       |      |                   |       |       |      | 0.51             | -0.38 | 1.41 | .260 | 0.18        | -0.22 | 0.58  | .370 |
| Region 6                     |             |       |       |      | -0.29        | -0.51 | -0.07 | .010 |                            |       |       |      |                   |       |       |      | 0.11             | -0.96 | 1.18 | .840 | 0.28        | -0.07 | 0.64  | .121 |
| Region 7                     |             |       |       |      |              |       |       |      |                            |       |       |      |                   |       |       |      | 0.65             | -0.22 | 1.51 | .143 | -0.20       | -0.60 | 0.19  | .315 |
| Region 8                     |             |       |       |      |              |       |       |      |                            |       |       |      |                   |       |       |      | 0.78             | 0.02  | 1.53 | .046 | 0.02        | -0.43 | 0.46  | .937 |
| Region 9                     |             |       |       |      |              |       |       |      |                            |       |       |      |                   |       |       |      | 0.34             | -0.64 | 1.32 | .498 | 0.00        | -0.47 | 0.47  | .998 |
| Region 10                    |             |       |       |      |              |       |       |      |                            |       |       |      |                   |       |       |      | -0.39            | -1.45 | 0.67 | .475 |             |       |       |      |
| Region 11                    |             |       |       |      |              |       |       |      |                            |       |       |      |                   |       |       |      | 0.85             | 0.06  | 1.63 | .035 |             |       |       |      |
| Region 12                    |             |       |       |      |              |       |       |      |                            |       |       |      |                   |       |       |      | 0.30             | -0.60 | 1.20 | .516 |             |       |       |      |
| Region 13                    |             |       |       |      |              |       |       |      |                            |       |       |      |                   |       |       |      | -0.27            | -1.27 | 0.74 | .606 |             |       |       |      |
| Region 14                    |             |       |       |      |              |       |       |      |                            |       |       |      |                   |       |       |      | 0.29             | -0.43 | 1.01 | .436 |             |       |       |      |
| Region 15                    |             |       |       |      |              |       |       |      |                            |       |       |      |                   |       |       |      | 0.55             | -0.20 | 1.30 | .153 |             |       |       |      |
| Region 16                    |             |       |       |      |              |       |       |      |                            |       |       |      |                   |       |       |      | 0.54             | -0.21 | 1.28 | .158 |             |       |       |      |

|           |       |       |      |      |
|-----------|-------|-------|------|------|
| Region 17 | 0.34  | -0.43 | 1.10 | .392 |
| Region 18 | 0.58  | -0.20 | 1.37 | .145 |
| Region 19 | 0.31  | -0.48 | 1.11 | .439 |
| Region 20 | 1.30  | 0.54  | 2.07 | .001 |
| Region 21 | -1.07 | -2.20 | 0.06 | .063 |
| Region 22 | 0.09  | -0.70 | 0.89 | .817 |
| Region 23 | 0.29  | -0.48 | 1.07 | .456 |

---

Occupation other: Prof., Tech., Manag., Clerical, Sales, Services, Skilled manual, other. Household: Did not work, Household & Domestic, Unskilled manual, None. Agriculture: Agric-self employed, Agric-employee. b: regression coefficient. LCL: 95% lower confidence limit. UCL: 95% upper confidence limit. P: p-value.
